# Supplementary material for: The Active Human Gut Microbiota Differs from the Total Microbiota
Source: PubMed Central journal article supplement (PMC3145646; doi:10.1371/journal.pone.0022448), 2011-07-28

# Sample 1

HC

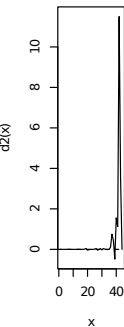

LC

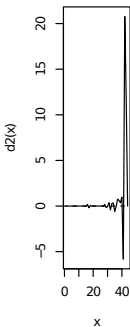

PA

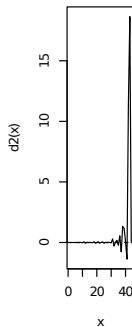

R

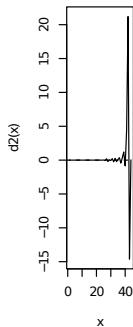

FS

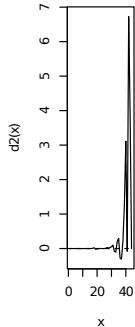

HC

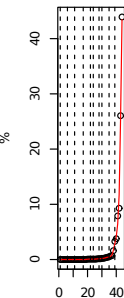

LC

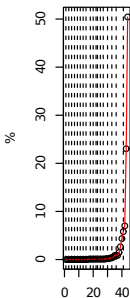

PA

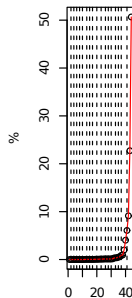

R

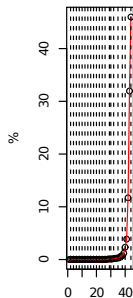

FS

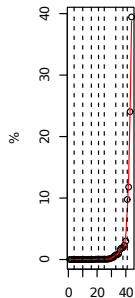

Supplement: pone.0022448.s002.pdf [file pone.0022448.s002.pdf]
