# Supplementary material for: The Active Human Gut Microbiota Differs from the Total Microbiota
Source: PubMed Central journal article supplement (PMC3145646; doi:10.1371/journal.pone.0022448), 2011-07-28

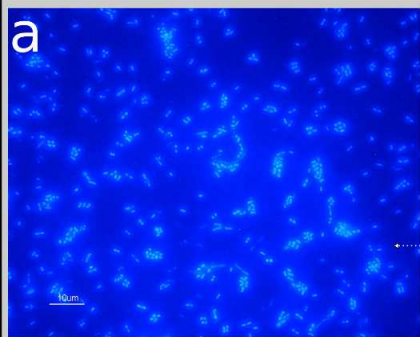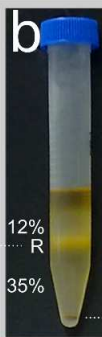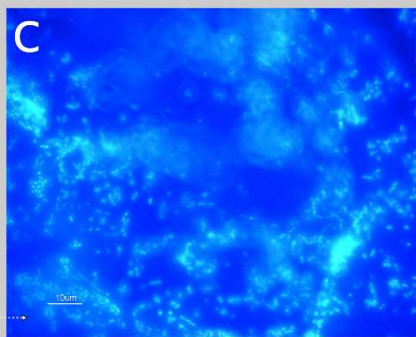

Supplement: pone.0022448.s006.pdf [file pone.0022448.s006.pdf]
