# Supplementary material for: The Active Human Gut Microbiota Differs from the Total Microbiota
Source: PubMed Central journal article supplement (PMC3145646; doi:10.1371/journal.pone.0022448), 2011-07-28
Supplement: pone.0022448.s010.pdf [file pone.0022448.s010.pdf]

| Probe    | Phylogroup                                                    | Sequence               | Reference |
|----------|---------------------------------------------------------------|------------------------|-----------|
| LGC354B  | Firmicutes                                                    | CGGAAGATTCCCTACTGC     | [69]      |
| Erec482  | Clostridium<br>Eubacterium<br>coccoides-<br>rectale<br>group  | GCTTCTTAGTCARGTACCG    | [70]      |
| Fprau645 | Firmicutes                                                    | CCTCTGCACTACTCAAGAAAAC | [71]      |
| CFB560   | Subgroup of Bacteroidetes                                     | WCCCTTTAAACCCART       | [72]      |
| CFB719   | Classes of Bacteroidetes,<br>Flavobacteria<br>Sphingobacteria | AGCTGCCTTCGCAATCGG     | [73]      |
