# Supplementary material for: The Active Human Gut Microbiota Differs from the Total Microbiota
Source: PLOS journal article supplement (doi:10.1371/journal.pone.0022448), 2011-07-28

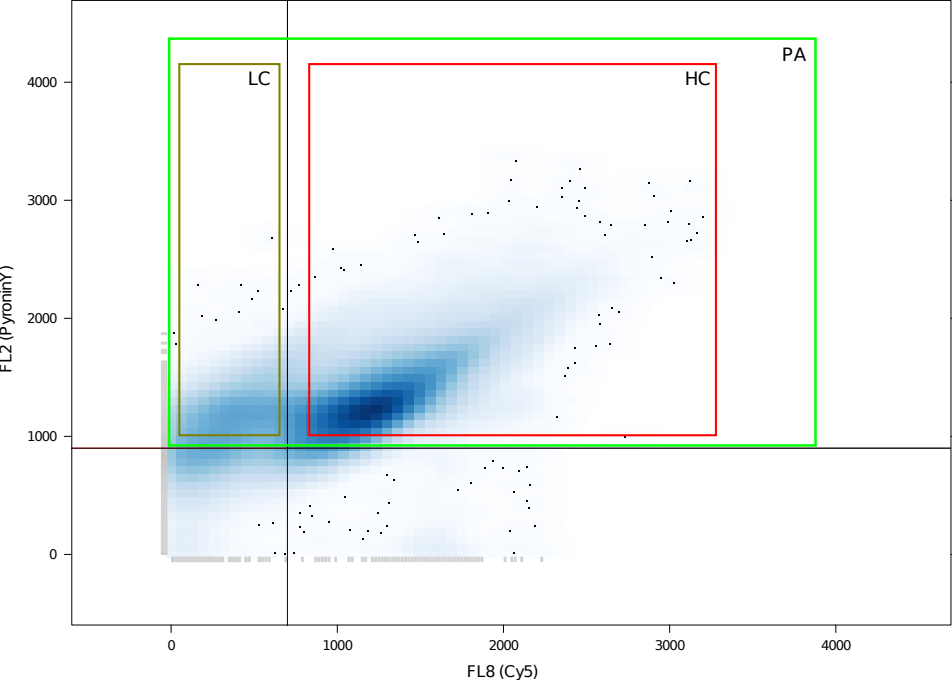

Supplement: S7 (10.1371/journal.pone.0022448.s007) [file journal.pone.0022448.s007]
