# Supplementary material for: The Active Human Gut Microbiota Differs from the Total Microbiota
Source: PLOS journal article supplement (doi:10.1371/journal.pone.0022448), 2011-07-28
Supplement: S8 (10.1371/journal.pone.0022448.s008) [file journal.pone.0022448.s008]

Sample collection  
in RNAlater

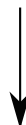

Homogenization by vortexing

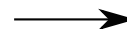

**Fecal Suspension (FS)**

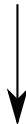

Histodenz centrifugation and  
detached cells recovery

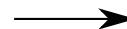

**Ring fraction (R)**

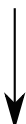

Fluorescent *in situ* hybridization

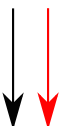

Pyronin-Y staining

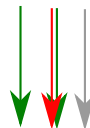

Sorting 1

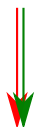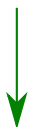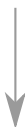

**High Cy5  
fraction (HC)**

**Low Cy5  
fraction (LC)**

Not considered  
events

Sorting 2

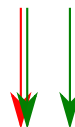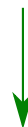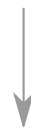

**Pyronin-Y stained  
cells fraction (PA)**

Not considered  
events
